# Supplementary material for: Association between progestin-only contraceptive use and cardiometabolic outcomes: A systematic review and meta-analysis
Source: PubMed Central journal article supplement — Eur J Prev Cardiol. 2018 May 10;25(10):1042–52. doi: 10.1177/2047487318774847 (PMC6039863; doi:10.1177/2047487318774847), 2018-05-10
Supplement: Supplemental_material.pdf [file Supplemental_material.pdf]

## SUPPLEMENTAL MATERIAL

**Supplemental figure 1:** Search strategy used in this review.

(((((contraceptives, oral OR ((contraception OR contracept\*) AND pill)) AND (progestin\* OR progestational, hormones, synthetic OR progestogen\* OR progesterone OR gestagen OR "progestin only" OR "progestogen only" OR "progestrogen only pill" OR minipill))) AND ((((((cardiovascular disease[MeSH Terms] OR heart disease OR stroke OR cerebrovascular disease OR cardiovascular disease OR coronary artery disease OR heart failure OR cardiovascular mortality OR coronary death OR CHD OR CVD OR cardiac death OR myocardial infarction OR angina))) OR ((diabetes OR diabetes mellitus OR DM OR T2DM OR T1DM))) OR (((("venous thromboembolism" OR VTE OR thromboembolism))) OR venous thromboembolism[MeSH Terms])) OR hypertension OR high blood pressure)))

Supplemental figure 2: Funnel plots for VTE, MI and stroke

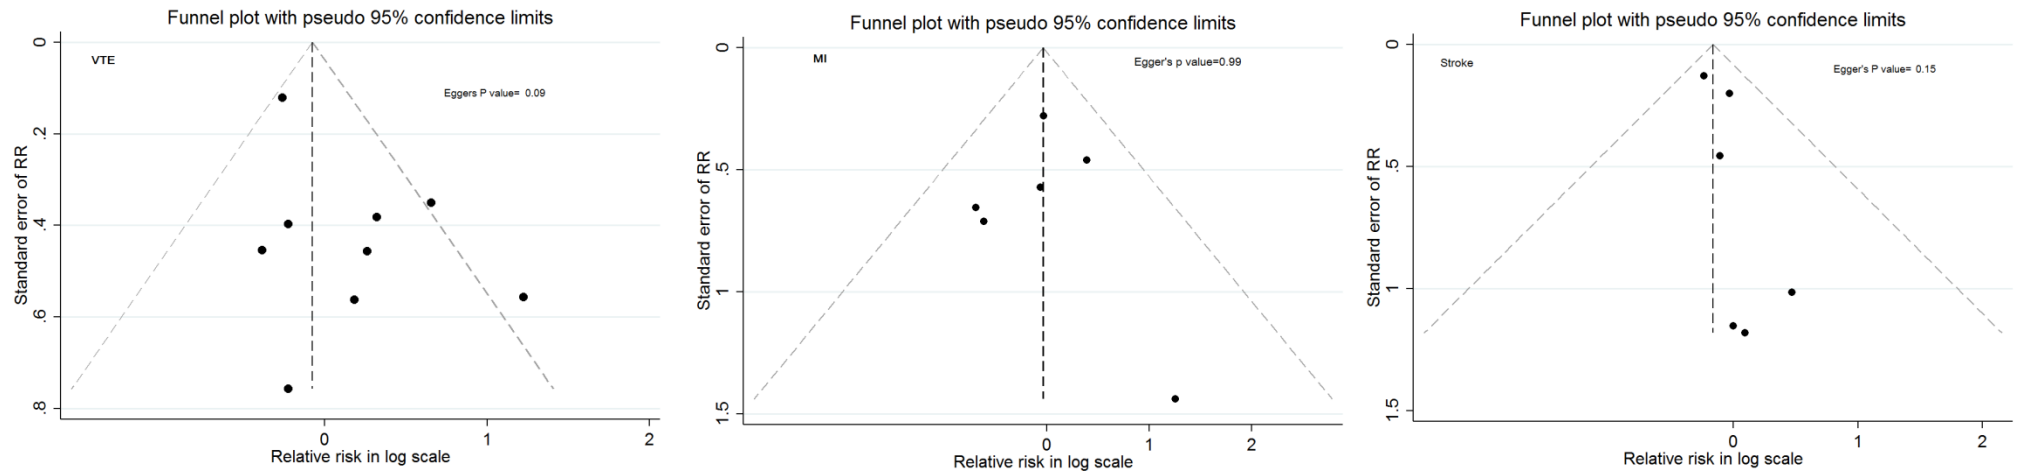

The dotted lines show 95% confidence intervals around the overall summary estimate calculated using a random effect model; *P*-values using Egger's test were 0.09; 0.99; and 0.15 for effect of POC use on VTE, MI and stroke respectively.





**Supplemental table 3:** Characteristics of the studies that investigated the association between progestin-only contraception use and risk of Venous Thromboembolism.

| Author                       | Study design        | Location            | Year of study | Age                                           | No. of participants used POC |       | Adjusted relative risk of VTE for users v non-users OR(95% CI) | Route of administration | Type of POC used                                                                                                              | Adjustment                                                                                                                            |
|------------------------------|---------------------|---------------------|---------------|-----------------------------------------------|------------------------------|-------|----------------------------------------------------------------|-------------------------|-------------------------------------------------------------------------------------------------------------------------------|---------------------------------------------------------------------------------------------------------------------------------------|
|                              |                     |                     |               |                                               | VT                           | no VT |                                                                |                         |                                                                                                                               |                                                                                                                                       |
| Barsoum et al, 2010          | Nested case-control | USA                 | 1988–2000     | 66.5 ± 20.2 (cases)<br>66.2 ± 20.1 (controls) | 3                            | 2     | 1.20 (0.4, 3.63)                                               | Oral                    | Medroxyprogesterone acetate 5 or 10 mg, Megestrol acetate 80– 120 mg                                                          | BMI, recent hospitalization, recent surgery, nursing home confinement, trauma or fracture, active cancer, leg paresis, varicose veins |
| Heinemann et al, 1999        | Case-control        | Europe              | 1993-1996     | 16-44                                         | 7                            | 54    | 0.68 (0.28, 1.66)                                              | Oral                    | Progestin only pills, type and dosage not available                                                                           | BMI                                                                                                                                   |
| Bergendal et al, 2014        | Case-control        | Europe, Sweden      | 2003-2009     | 18-54                                         | 61                           | 99    | 0.8 (0.4-1.9)                                                  | Oral                    | Levonorgestrel, Norethisterone, Lynestrenol                                                                                   | Smoking, BMI, immobilization                                                                                                          |
|                              |                     |                     |               |                                               | 47                           | 23    | 2.2 (1.3-4.0)                                                  | Injectable              | Medroxyprogesterone acetate                                                                                                   |                                                                                                                                       |
|                              |                     |                     |               |                                               | 61                           | 99    | 0.6 (0.4-1.0)                                                  | IUD                     | Levonorgestrel                                                                                                                |                                                                                                                                       |
|                              |                     |                     |               |                                               | 25                           | 35    | 0.9 (0.5-1.6)                                                  | Oral+ Implant           | Desogestrel,Etonogestrel,Levonorgestrel                                                                                       |                                                                                                                                       |
| WHO, 1998                    | Case-control        | Worldwide           | 1989-1993     | 20-44                                         | 169                          | 221   | 0.99 (0.54, 1.79)*                                             | Oral, IUD, injectable   | Levonorgestrel, Norethisterone, Lynestrenol, MPA                                                                              | BMI                                                                                                                                   |
|                              |                     |                     |               |                                               | 21                           | 63    | 1.82 (0.79-4.22)                                               | Oral                    | d-Norgestrel 0.75 mg<br>Anorethidrate dipropionate 7.5 mg                                                                     |                                                                                                                                       |
|                              |                     |                     |               |                                               | 11                           | 34    | 2.19 (0.66-7.26)                                               | Injectable              | dl-Norgestrel 3.0 mg<br>Norethisterone 5.0 mg<br>Depo medroxyprogesterone acetate , 150mg<br>Norethisterone oenanthate, 200mg |                                                                                                                                       |
| Vasilakis et al, 1999        | Nested case-control | Europe, UK          | 1993-1997     | <50                                           | 32                           | 97    | 1.87 (0.86, 4.07)*                                             | Pooled                  | Oral+Injectable                                                                                                               | BMI, smoking                                                                                                                          |
|                              |                     |                     |               |                                               | 7                            | 6     | 2.4 (0.8, 6.5)                                                 | Oral+ IUD               | Progestagens ≤0.5mg<br>Injectable, 150mg<br>Transdermal, 228mg<br>Levonogestrel                                               |                                                                                                                                       |
| Vlieg et al, 2010            | Case-control        | Europe, Netherlands | 1999-2004     | 18-50                                         | 4                            | 4     | 3.4 (0.8-13.7)                                                 | Oral                    |                                                                                                                               | Age, BMI, family history of deep vein VTE, smoking                                                                                    |
|                              |                     |                     |               |                                               | 20                           | 15    | 3.6 (1.8, 7.1)                                                 | Injectable              | Depo medroxyprogesterone acetate, dose not available                                                                          |                                                                                                                                       |
|                              |                     |                     |               |                                               | 3                            | 26    | 0.3 (0.1, 1.1)                                                 | IUD                     | Levonogestrel                                                                                                                 |                                                                                                                                       |
| Conard et al, 2004           | Cohort              | Europe, France      | 1992-1997     | 15-50                                         | 23                           | 41    | 1.09 (0.1, 12.46)*                                             | Pooled                  | DMPA, Levonogestrel                                                                                                           | Age, thrombophilia and BMI                                                                                                            |
|                              |                     |                     |               |                                               | 3                            | 99    | 0.8 (0.2, 3.9)                                                 | Oral                    | Chlormadinone acetate (CMA), a 17a-hydroxyprogesterone derivative, 10mg                                                       |                                                                                                                                       |
| Vaillant-Roussel et al, 2011 | Cohort              | Europe, France      | 1995-2008     | 17-53                                         | 7                            | 27    | 1.3 (0.5, 3)                                                   | Oral                    | Progestin only contraceptives, type or dosage not available                                                                   | Age, thrombophilia and BMI                                                                                                            |
| Lidegaard et al, 2012        | Cohort              | Europe, Denmark     | 2001-2010     | 15-49                                         | 15                           | NA    | 0.51 (0.23,1.14)                                               | Oral                    | Norethisterone, Desogestrel                                                                                                   | Age, calendar year, education                                                                                                         |
|                              |                     |                     |               |                                               | 55                           | NA    | 0.95 (0.65,1.38)                                               | Intrauterine device     | Levonorgestrel                                                                                                                |                                                                                                                                       |
|                              |                     |                     |               |                                               | 70                           | NA    | 0.77 (0.44, 1.37)*                                             | Pooled oral+ IUD        | Norethisterone, Desogestrel, Levonorgestrel                                                                                   |                                                                                                                                       |

† Incidence rate ratio (from Poisson regression and Cox proportional hazard regression), results from Cox model shown

‡ HR obtained from Cox proportional hazard regression

\*Incidence rate ratio (from Poisson regression)/ Summary measure for all progestin-only contraceptive users versus non-users calculated based on the results from different subgroups or oral  
NA: no information in the original paper  
IUD: intrauterine device

**Supplemental table 4:** Studies investigating the association of progestin-only pill with risk of Myocardial Infarction

| Author                                                               | Study design | Location   | Year of study | Age   | No. of participants exposed to POC |        | Route of administration | Type of POC used                                                                                           | Type of MI       | Adjusted relative risk of MI for users v non-users RR (95% CI) | Adjustment                                                                                 |
|----------------------------------------------------------------------|--------------|------------|---------------|-------|------------------------------------|--------|-------------------------|------------------------------------------------------------------------------------------------------------|------------------|----------------------------------------------------------------|--------------------------------------------------------------------------------------------|
|                                                                      |              |            |               |       | MI                                 | No MI  |                         |                                                                                                            |                  |                                                                |                                                                                            |
| Heinemann et al, 1999                                                | Case-control | Europe     | 1993-1996     | 16-44 | 7                                  | 17     | Oral                    | Progestin only pills, type and dosage not available                                                        | MI               | 0.94(0.31, 2.91)                                               | Age, HBP, diabetes, smoking, education                                                     |
| Dunn et al, 1999                                                     | Case-control | Europe, UK | 1993-1995     | 16-44 | 9                                  | 49     | Oral                    | Progestogen only                                                                                           | Fatal MI         | 1.48 (0.6, 3.65)                                               | Age, smoking, BMI, HBP, diabetes, family history of MI                                     |
| WHO, 1998                                                            | Case-control | Worldwide  | 1989-1993     | 20-44 | 3                                  | 6      | Oral                    | d-Norgestrel 0.75 mg<br>Anorethidrate dipropionate 7.5 mg<br>dl-Norgestrel 3.0 mg<br>Norethisterone 5.0 mg | Non-fatal MI     | 0.98 (0.16, 5.97)                                              | Age, HBP, diabetes, smoking                                                                |
|                                                                      |              |            |               |       | 1                                  | 7      | Injectable              | Depo medroxyprogesterone acetate , 150mg<br>Norethisterone oenanthate, 200mg                               |                  |                                                                |                                                                                            |
|                                                                      |              |            |               |       |                                    |        | Pooled                  | oral+Injectable                                                                                            |                  |                                                                |                                                                                            |
| Petitti et al, 1998                                                  | Case-control | USA        | 1990          | 18-44 | 1                                  | 1      | Implant                 | Levonorgestrel                                                                                             | MI               | 3.5 (0.2, 56.5)                                                | Age                                                                                        |
| Thorogood et al, 1992                                                | Case-control | UK         | 1986-1988     | 16-39 | 3                                  | 12     | Oral                    | NA                                                                                                         | Fatal MI         | 0.5 (0.14, 1.83)                                               | Age, marital status                                                                        |
| Lidegaard et al, 2012                                                | Cohort       | Denmark    | 1995-2009     | 15-49 | 13                                 | NA     | Oral                    | Pooled Norethindrone and Desogestrel                                                                       | Non-fatal MI     | 0.97 (0.56, 1.68)                                              | Age, education level, calendar year, hypertension, heart disease, diabetes, hyperlipidemia |
|                                                                      |              |            |               |       | 31                                 | NA     | IUD                     | Levonorgestrel                                                                                             |                  |                                                                |                                                                                            |
|                                                                      |              |            |               |       | 3                                  | NA     | Implant                 | NA                                                                                                         |                  |                                                                |                                                                                            |
|                                                                      |              |            |               |       | 34                                 | NA     | Pooled                  | IUD +implant                                                                                               |                  |                                                                |                                                                                            |
|                                                                      |              |            |               | 46    | NA                                 | Pooled | Oral+ IUD +implant      |                                                                                                            | 1.06 (0.79,1.41) |                                                                |                                                                                            |
| NA: no information in the original paper<br>IUD: intrauterine device |              |            |               |       |                                    |        |                         |                                                                                                            |                  |                                                                |                                                                                            |

**Supplemental table 5:** Studies investigating the association of progestin-only pill with Stroke

| Author                | Study design | Location        | Year of study | Age   | No. of participants exposed to POC |                   | Route of administration | POC Type                                                                                                   | Type of Stroke | Adjusted relative risk of Stroke for users v non-users RR (95% CI) | Adjustment                                                                                 |
|-----------------------|--------------|-----------------|---------------|-------|------------------------------------|-------------------|-------------------------|------------------------------------------------------------------------------------------------------------|----------------|--------------------------------------------------------------------|--------------------------------------------------------------------------------------------|
|                       |              |                 |               |       | Stroke                             | No stroke         |                         |                                                                                                            |                |                                                                    |                                                                                            |
| Heinemann et al, 1999 | Case-control | Europe          | 1993-1996     | 16-44 | 3                                  | 10                | Oral                    | Progestin only pills, type and dosage not available                                                        | Ischemic       | 1.6 (0.2, 10.72)                                                   | HBP, alcohol, smoking                                                                      |
| WHO , 1998            | Case-control | Worldwide       | 1989-1993     | 20-44 | 54                                 | 151               | Oral                    | d-Norgestrel 0.75 mg<br>Anorethidrate dipropionate 7.5 mg<br>dl-Norgestrel 3.0 mg<br>Norethisterone 5.0 mg | All            | 1.07 (0.62, 1.86)                                                  | HBP, smoking, marital                                                                      |
|                       |              |                 |               |       | 1                                  | 7                 | Injectable              | Depo medroxyprogesterone acetate , 150mg<br>Norethisterone oenanthate, 200mg                               |                | 0.89 (0.53, 1.49)                                                  |                                                                                            |
|                       |              |                 |               |       | 55                                 | 158               | Pooled                  | Oral and injectable                                                                                        |                | 0.97 (0.64, 1.41)                                                  |                                                                                            |
| Petitti et al, 1998   | Case-control | USA             | 1990          | 18-44 | 1                                  | 3                 | Implant                 | Levonorgestrel                                                                                             | All            | 1.0 (0.1, 9.2)                                                     | Age                                                                                        |
| Lidegaard et al, 1993 | Case-control | Europe, Denmark | 1990-1991     | 15-44 | 7                                  | 18                | Oral                    | Minipill (progestogen)                                                                                     | Ischemic       | 0.9 (0.4, 2.4)                                                     | Age, education, smoking, migraine                                                          |
| Tzourio et al,1995    | Case-control | Europe, France  | 1990-1993     | 18-44 | 1                                  | 4                 | Oral                    | Progestogen only                                                                                           | Ischemic       | 1.1 (0.1, 10.3)                                                    | Crude                                                                                      |
| Lidegaard et al, 2012 | Cohort       | Denmark         | 1995-2009     | 15-49 | 86                                 | 115 059 person-yr | Oral                    | Pooled Norethindrone and Desogestrel                                                                       |                | 0.97 (0.56, 1.68)*                                                 | Age, education level, calendar year, hypertension, heart disease, diabetes, hyperlipidemia |
|                       |              |                 |               |       | 45                                 | 184 875 person-yr | IUD                     | Levonorgestrel                                                                                             | Thrombotic     | 0.73 (0.54, 0.98)                                                  |                                                                                            |
|                       |              |                 |               |       | 3                                  | 24 954 person-yr  | Implant                 | NA                                                                                                         |                | 0.88 (0.28, 2.72)                                                  |                                                                                            |
|                       |              |                 |               |       | 48                                 | 209 829 person-yr | Pooled                  | Implant+ IUD                                                                                               |                | 0.74 (0.55,0.99)                                                   |                                                                                            |
|                       |              |                 |               |       | 130                                | 324 888 person-yr | Pooled                  | Oral, IUD, injectable, implant                                                                             |                | 0.78 (0.61,1.01)                                                   |                                                                                            |

NA: no information in the original paper  
IUD: intrauterine device



**Supplemental table 6:** Showing cohort studies examining the association of progestin-only pill with Hypertension

| Author                        | Study design | Location | Year of study | Age   | No. of participants | POC used                                                          | Result                                                                                                                                          | Adjustment                  |
|-------------------------------|--------------|----------|---------------|-------|---------------------|-------------------------------------------------------------------|-------------------------------------------------------------------------------------------------------------------------------------------------|-----------------------------|
| Spellacy and Birk et al, 1972 | Cohort       | USA      | 1972-74       | 16-45 | 415                 | Injectable: DMPA<br>Oral: NG 0.075 mg, ethynodiol acetate 0.25 mg | Progestogen-only group using NG showed a significant fall in DBP                                                                                | Age, height, weight, parity |
| Hall et al, 1980              | Cohort       | USA      | 1980-82       | 16-55 | 792                 | NET 0.35 mg                                                       | No association between minipill use and high BP                                                                                                 | Age, weight                 |
| Wilson et al, 1984            | Cohort       | Scotland | 1984-87       | 15-49 | 593                 | Norethisterone, Levonorgestrel ,<br>Injection: NET enanthate      | No change or fall of blood pressure in progestogen-only methods<br>NG use associated with fall in DBP, evident until after 2 years of follow-up | Smoking habits              |

**Supplemental table 7:** Showing a case-control study examining the association of progestin-only pill with Type II Diabetes

| Author                                                                   | Study design | Location                    | Year of study | Age       | No. of participants        | POC used | Outcome/Result             | Adjustment                                                                 |
|--------------------------------------------------------------------------|--------------|-----------------------------|---------------|-----------|----------------------------|----------|----------------------------|----------------------------------------------------------------------------|
| Kim et al, 2001                                                          | Case-control | USA                         | 1998          | 18-50     | Cases/Controls<br>284/570  | DMPA     | OR: 2.4 (95% CI, 1.3-4.6)  | BMI                                                                        |
|                                                                          |              |                             |               |           |                            |          | OR: 2.1 (95% CI, 1.03-4.3) | Age, BMI, parity                                                           |
|                                                                          |              |                             |               |           |                            |          | OR 1.6 (95%CI 0.77- 3.5)   | Age, BMI, parity, gestational diabetes diagnosed after contraception given |
| International Collaborative Post-Marketing Surveillance of Norplant,2001 | Cohort       | Multicultural (8 countries) | 1989-1997     | Mean 28.8 | 16,021 women, 12 T2D cases | Norplant | RR: 2.42 (0.73-8.1)        | Clinics, age, body weight                                                  |
